# Supplementary material for: Characterization of a stable QTL for flag leaf width and its genetic effects on yield-related traits
Source: Research Square preprint supplement (doi:10.21203/rs.3.rs-7921960/v1), 2025-11-14
Supplement: Supplementary file 1 [file ca459f237f133af57f374732.xlsx]

## Sheet: Table S1
Table S1 Primer sequences for 4B-ID molecular markers
Primer	Forward (5'-3')	Reward (5'-3')
4BFLW-290	ACCAGATTGTACGGAATAGGG	GAACATTGGAAGGTGACAACA

## Sheet: Table S2
Table S2 The information of 314 wheat variety (lines) used in this study
Type	Number	Varieties (lines)	Decade	Origin	Genotype
					AX-109526283	AX-109580651	AX-109347500
					KN4B:31705963	KN4B:31958235	KN4B:47634608
Excellent haplotype	1	Zimai 29	Shandong,China	2010s	GG	GG	CC
	2	Zhongmai 23	Beijing,China	2010s	GG	GG	CC
	3	Yan 1212	Shandong,China	2010s	GG	GG	CC
	4	Shannong 116	Shandong,China	2010s	GG	GG	CC
	5	Taikemai 30	Shandong,China	2010s	GG	GG	CC
	6	BFB10	Beijing,China	-	GG	GG	CC
	7	Zhongmai 1062	Beijing,China	2010s	GG	GG	CC
	8	Lunxuan 1690	Beijing,China	2010s	GG	GG	CC
	9	Zhongmai 895	Beijing,China	2010s	GG	GG	CC
	10	Zhongmai 415	Beijing,China	2010s	GG	GG	CC
	11	Mianyang28	Sichuan,China	1990s	GG	GG	CC
	12	Chuanyu 21	Sichuan,China	2000s	GG	GG	CC
	13	Luozhen 1	Henan,China	1990s	GG	GG	CC
	14	Jiachabangdadongmai 4	Xizang,China	-	GG	GG	CC
	15	Chuanmai 46	Sichuan,China	2000s	GG	GG	CC
	16	Chuanmai 45	Sichuan,China	2000s	GG	GG	CC
	17	Zangchun 6	Xizang,China	1980s	GG	GG	CC
	18	Chuanmai 41	Sichuan,China	2000s	GG	GG	CC
	19	Zhongkemai 47	Sichuan,China	2010s	GG	GG	CC
	20	Chuannong 16	Sichuan,China	2000s	GG	GG	CC
	21	Chuanyu 20	Sichuan,China	2000s	GG	GG	CC
	22	Chuanmai 104	Sichuan,China	2010s	GG	GG	CC
	23	Chuanyu 19	Sichuan,China	2000s	GG	GG	CC
	24	Bailangmai	Xizang,China	-	GG	GG	CC
	25	Ningchun 26	Ningxia,China	1990s	GG	GG	CC
	26	Yangmai 15	Jiangsu,China	2000s	GG	GG	CC
	27	Qingchun 254	Qinghai,China	1990s	GG	GG	CC
	28	Humai 12	Qinghai,China	1980s	GG	GG	CC
	29	Minhe853	Qinghai,China	1990s	GG	GG	CC
	30	Qingchun 587	Qinghai,China	2000s	GG	GG	CC
	31	Minhe588	Qinghai,China	1990s	GG	GG	CC
	32	Bobwhite	Mexico	-	GG	GG	CC
	33	Gaoyuan412	Qinghai,China	2000s	GG	GG	CC
	34	Minhe 665	Qinghai,China	2000s	GG	GG	CC
	35	Gaoyuan 465	Neimenggu,China	1990s	GG	GG	CC
	36	Humai 13	Qinghai,China	2000s	GG	GG	CC
	37	Linmai 7	Shandong,China	-	GG	GG	CC
	38	Linmai 8	Shandong,China	-	GG	GG	CC
	39	Taishan 28	Shandong,China	2010s	GG	GG	CC
	40	Liangxing 162	Shandong,China	-	GG	GG	CC
	41	Yannong 22	Shandong,China	2000s	GG	GG	CC
	42	Yannong 999	Shandong,China	2010s	GG	GG	CC
	43	Liaomai 2	Shandong,China	-	GG	GG	CC
	44	Luyuan 502	Shandong,China	2010s	GG	GG	CC
	45	Jinan 17	Shandong,China	1990s	GG	GG	CC
	46	Jimai 37	Shandong,China	-	GG	GG	CC
	47	Qimai 1	Shandong,China	2000s	GG	GG	CC
	48	Lumai 21	Jiangsu,China	2000s	GG	GG	CC
	49	Qingnong 6	Shandong,China	2010s	GG	GG	CC
	50	Hemai 17	Shandong,China	2010s	GG	GG	CC
	51	HengS 29	Hebei,China	2010s	GG	GG	CC
	52	Yaomai 16	Shanxi,China	2010s	GG	GG	CC
	53	Shannong 711	Shandong,China	-	GG	GG	CC
	54	Cangmai 028	Hebei,China	2000s	GG	GG	CC
	55	Taikemai 33	Shandong,China	2010s	GG	GG	CC
	56	Kenong 9204	Hebei,China	2000s	GG	GG	CC
	57	Freeman	Foreign	-	GG	GG	CC
	58	Guigu 328	Hebei,China	-	GG	GG	CC
	59	Zhoumai 18	Henan,China	2000s	GG	GG	CC
	60	Zhengmai 366	Henan,China	2000s	GG	GG	CC
	61	Xumai 35	Jiangsu,China	2010s	GG	GG	CC
	62	Puxing 5	Henan,China	2010s	GG	GG	CC
	63	Ankemai 1405	Anhui,China	2010s	GG	GG	CC
	64	Xinmai 19	Henan,China	2000s	GG	GG	CC
	65	Zhoumai 32	Henan,China	2010s	GG	GG	CC
	66	Ruiquanmai 168	Shanxi,China	-	GG	GG	CC
	67	Zhoumai 22	Henan,China	2000s	GG	GG	CC
	68	Xinmai 26	Henan,China	2010s	GG	GG	CC
	69	Luomai 31	Henan,China	2010s	GG	GG	CC
	70	Luomai 28	Henan,China	2010s	GG	GG	CC
	71	Yanzhan 4110	Henan,China	2000s	GG	GG	CC
	72	Yumai 21	Henan,China	1990s	GG	GG	CC
	73	Xiaoyan 68	Shanxi,China	2010s	GG	GG	CC
	74	Xinong 9871	Shanxi,China	2000s	GG	GG	CC
	75	Xinong 209	Shanxi,China	2010s	GG	GG	CC
	76	Xinong 2000	Shanxi,China	2000s	GG	GG	CC
	77	Shan 157	Shanxi,China	-	GG	GG	CC
	78	Shan 538	Shanxi,China	-	GG	GG	CC
	79	Qinnong 142	Shanxi,China	2000s	GG	GG	CC
	80	Xianyangdasui	Shanxi,China	地方种	GG	GG	CC
	81	Yangmai 13	Jiangsu,China	2000s	GG	GG	CC
	82	Yangmai 14	Jiangsu,China	2000s	GG	GG	CC
	83	Yangmai 17	Jiangsu,China	2000s	GG	GG	CC
	84	CMT-3	Foreign	-	GG	GG	CC
	85	CMT-5	Foreign	-	GG	GG	CC
	86	CMT-6	Foreign	-	GG	GG	CC
	87	CMT-7	Foreign	-	GG	GG	CC
	88	CMT-8	Foreign	-	GG	GG	CC
	89	CMT-9	Foreign	-	GG	GG	CC
	90	CMT-1011	Foreign	-	GG	GG	CC
	91	CMT-1012	Foreign	-	GG	GG	CC
	92	CMT-11	Foreign	-	GG	GG	CC
	93	CMT-12	Foreign	-	GG	GG	CC
	94	CMT-13	Foreign	-	GG	GG	CC
	95	CMT-14	Foreign	-	GG	GG	CC
	96	CMT-15	Foreign	-	GG	GG	CC
	97	CMT-16	Foreign	-	GG	GG	CC
	98	CMT-17	Foreign	-	GG	GG	CC
	99	CMT-18	Foreign	-	GG	GG	CC
	100	CMT-19	Foreign	-	GG	GG	CC
	101	CMT-20	Foreign	-	GG	GG	CC
	102	CMT-21	Foreign	-	GG	GG	CC
	103	CMT-22	Foreign	-	GG	GG	CC
	104	CMT-23	Foreign	-	GG	GG	CC
	105	CMT-24	Foreign	-	GG	GG	CC
	106	CMT-25	Foreign	-	GG	GG	CC
	107	CMT-26	Foreign	-	GG	GG	CC
	108	CMT-27	Foreign	-	GG	GG	CC
	109	CMT-28	Foreign	-	GG	GG	CC
	110	CMT-29	Foreign	-	GG	GG	CC
	111	CMT-30	Foreign	-	GG	GG	CC
	112	Bendimai	Guizhou,China	地方种	GG	GG	CC
	113	Caijiangmai	Guizhou,China	地方种	GG	GG	CC
	114	Dazibai	Shanxi,China	地方种	GG	GG	CC
	115	Dingxingzhai	Shanxi,China	地方种	GG	GG	CC
	116	Fumai	Henan,China	地方种	GG	GG	CC
	117	Hongheshangtou	Anhui,China	地方种	GG	GG	CC
	118	Hongkeyoumang	Hunan,China	地方种	GG	GG	CC
	119	Hongxiuzi	China	地方种	GG	GG	CC
	120	Huxumai	Anhui,China	地方种	GG	GG	CC
	121	Huoqiu	Liaoning,China	地方种	GG	GG	CC
	122	Jiangdongmen	Jiangsu,China	地方种	GG	GG	CC
	123	Kangdingxiaomai	Sichuan,China	地方种	GG	GG	CC
	124	TIBET	Xizang,China	地方种	GG	GG	CC
	125	Mara	Italy	-	GG	GG	CC
	126	Baihuamai	Zhejiang,China	地方种	GG	GG	CC
	127	Baimaizi	Sichuan,China	地方种	GG	GG	CC
	128	Baiyoumai	Heilongjiang,China	地方种	GG	GG	CC
	129	Ningchun 13	Ningxia,China	1990s	GG	GG	CC
	130	Xingmai 11	Hebei,China	2000s	GG	GG	CC
	131	Han 6172	Hebei,China	2000s	GG	GG	CC
	132	Yannong 24	Shandong,China	2000s	GG	GG	CC
	133	Kaimai 21	Henan,China	2010s	GG	GG	CC
	134	Chuanmai 8	Sichuan,China	1970s	GG	GG	CC
	135	Changhuai 18	Shandong,China	1970s	GG	GG	CC
	136	5467	Iran	-	GG	GG	CC
	137	IRAGI	Iraq	-	GG	GG	CC
	138	Tito	Mexico	-	GG	GG	CC
	139	uR8	Uruguay	-	GG	GG	CC
	140	ALSHVEDE	Denmark	-	GG	GG	CC
	141	AURORA	Russia	-	GG	GG	CC
	142	RIETI	Italy	-	GG	GG	CC
	143	PNE209-1	Pakistan	-	GG	GG	CC
	144	PNE264-4	Pakistan	-	GG	GG	CC
	145	Lleafen	Australia	-	GG	GG	CC
	146	Penawa	Canada	-	GG	GG	CC
	147	Magnif G	Argentina	-	GG	GG	CC
	148	Tosson	Egypt	-	GG	GG	CC
	149	Kuro	Kenya	-	GG	GG	CC
	150	PADUS	Italy	-	GG	GG	CC
	151	Mingguangxiaomai	Japan	-	GG	GG	CC
	152	Shuiyuan 86	Korea	-	GG	GG	CC
Non-excellent haplotype	153	Younongmai 887	Hebei,China	-	AA	AA	CC
	154	Liangxing 517	Shandong,China	-	AA	AA	CC
	155	Luohan 6	Henan,China	2000s	AA	AA	CC
	156	Jimai 262	Shandong,China	2010s	AA	AA	CC
	157	Jing 411	Beijing,China	1990s	AA	AA	CC
	158	Chuanyu 17	Sichuan,China	2000s	AA	AA	CC
	159	Zhangchun 811	Qinghai,China	1990s	AA	AA	CC
	160	Xiangnong 3	Qinghai,China	-	AA	AA	CC
	161	Humai 14	Qinghai,China	2000s	AA	AA	CC
	162	Qingchun 891	Qinghai,China	1990s	AA	AA	CC
	163	Zimai 12	Shandong,China	2000s	AA	AA	CC
	164	Linmai 4	Shandong,China	2000s	AA	AA	CC
	165	Wennong 5	Shandong,China	2000s	AA	AA	CC
	166	Wennong 18	Shandong,China	-	AA	AA	CC
	167	Laizhou 953	Shandong,China	1990s	AA	AA	CC
	168	Liangxing 66	Shandong,China	2000s	AA	AA	CC
	169	Liaomai 18	Shandong,China	2000s	AA	AA	CC
	170	Shannong 17	Shandong,China	2000s	AA	AA	CC
	171	Shannong 22	Shandong,China	2010s	AA	AA	CC
	172	Luyuan 202	Shandong,China	2000s	AA	AA	CC
	173	Jimai 23	Shandong,China	2010s	AA	AA	CC
	174	KY088	Shandong,China	2010s	AA	AA	CC
	175	Zhongmai 175	Beijing,China	2010s	AA	AA	CC
	176	PI27701	America	-	AA	AA	CC
	177	Bainong 4199	Henan,China	2010s	AA	AA	CC
	178	Aikang 58	Henan,China	2000s	AA	AA	CC
	179	Yumai 34	Henan,China	1990s	AA	AA	CC
	180	Zhengyin 1	Italy	-	AA	AA	CC
	181	Luomai 21	Henan,China	2000s	AA	AA	CC
	182	Zhoumai 27	Henan,China	2000s	AA	AA	CC
	183	Hezuo 2	Heilongjiang,China	-	AA	AA	CC
	184	Fengchan 3	Shanxi,China	1970s	AA	AA	CC
	185	Dundec	Australia	-	AA	AA	CC
	186	WHITEFEDERATION 60	America	-	AA	AA	CC
	187	RAMONA 65	America	-	AA	AA	CC
	188	PSATHAS	Cyprus	-	AA	AA	CC
	189	FIFE	Poland	-	AA	AA	CC
	190	Rena	CzechRepublic	-	AA	AA	CC
	191	celebration	Australia	-	AA	AA	CC
	192	AC Foremost	Canada	-	AA	AA	CC
	193	AC Taber	Canada	-	AA	AA	CC
	194	Biggar	Canada	-	AA	AA	CC
	195	Canberra	Australia	-	AA	AA	CC
Recombinants	196	Zhongxin 8678	Hebei,China	2010s	AA	AA	TT
	197	Mian 37	Sichuan,China	2000s	AA	AA	TT
	198	Shixin 828	Hebei,China	2000s	AA	GG	CC
	199	Yunong 416	Henan,China	2000s	AA	GG	CC
	200	Luohan 7	Henan,China	2000s	AA	GG	TT
	201	Zhongyou 629	Beijing,China	2010s	AA	GG	TT
	202	Zhongyou 9507	Beijing,China	2000s	AA	GG	TT
	203	CA12108	Beijing,China	-	AA	GG	TT
	204	Qingchun 415	Qinghai,China	1990s	AA	GG	TT
	205	Taishan 24	Shandong,China	2000s	AA	GG	TT
	206	Luyuan 288	Shandong,China	-	AA	GG	TT
	207	Huaimai 22	Jiangsu,China	2000s	AA	GG	TT
	208	Acimital	Australia	-	AA	GG	TT
	209	Darkan	Australia	-	AA	GG	TT
	210	Huiyan 912	Anhui,China	2020s	GG	GG	TT
	211	Jimai 631	Hebei,China	-	GG	GG	TT
	212	Wennong 29	Shandong,China	-	GG	GG	TT
	213	Jimai 22	Shandong,China	2000s	GG	GG	TT
	214	Taikemai 31	Shandong,China	2010s	GG	GG	TT
	215	Jimai 39	Hebei,China	2010s	GG	GG	TT
	216	Jimai 181	Shandong,China	2010s	GG	GG	TT
	217	Shimai 25	Hebei,China	2010s	GG	GG	TT
	218	Shannong 25	Shandong,China	2010s	GG	GG	TT
	219	Qubaichun	Xizang,China	地方种	GG	GG	TT
	220	Chuanmai 42	Sichuan,China	2000s	GG	GG	TT
	221	Zhongguochun	Sichuan,China	地方种	GG	GG	TT
	222	Chuannong 12	Sichuan,China	2000s	GG	GG	TT
	223	Chuanyu 16	Sichuan,China	2000s	GG	GG	TT
	224	Chuannong 19	Sichuan,China	2000s	GG	GG	TT
	225	Chuanmai 107	Sichuan,China	2000s	GG	GG	TT
	226	Zhongkemai 138	Sichuan,China	2010s	GG	GG	TT
	227	Chuanmai 36	Sichuan,China	2000s	GG	GG	TT
	228	Chuanmai 58	Sichuan,China	2010s	GG	GG	TT
	229	Mian 38	Sichuan,China	2000s	GG	GG	TT
	230	Chuanyu 23	Sichuan,China	2000s	GG	GG	TT
	231	Nei 2889	Neimenggu,China	-	GG	GG	TT
	232	Zhengmai 9023	Henan,China	2000s	GG	GG	TT
	233	Moyin 2	Mexico	-	GG	GG	TT
	234	Tongmai 1	Qinghai,China	2000s	GG	GG	TT
	235	Xinzhe 9	Qinghai,China	1980s	GG	GG	TT
	236	Gaoyuan 356	Qinghai,China	1990s	GG	GG	TT
	237	Ganchun 20	Gansu,China	1990s	GG	GG	TT
	238	Qingnong 469	Qinghai,China	1980s	GG	GG	TT
	239	Mobo/Potam-S70	Mexico	-	GG	GG	TT
	240	Gaoyuan182	Qinghai,China	1960s	GG	GG	TT
	241	Taishan 22	Shandong,China	2000s	GG	GG	TT
	242	Weimai 8	Shandong,China	2000s	GG	GG	TT
	243	Jimai 20	Shandong,China	2000s	GG	GG	TT
	244	Xinmai 296	Shandong,China	2010s	GG	GG	TT
	245	Tiantaiyoumai 1	Shandong,China	-	GG	GG	TT
	246	Tiantaiyoumai 6	Shandong,China	-	GG	GG	TT
	247	Zhongmai 4079	Beijing,China	-	GG	GG	TT
	248	Shi 4185	Hebei,China	1990s	GG	GG	TT
	249	Xingmai 13	Hebei,China	2010s	GG	GG	TT
	250	Annong 1124	Anhui,China	2010s	GG	GG	TT
	251	Lankao 198	Henan,China	2010s	GG	GG	TT
	252	Zhoumai 28	Henan,China	2010s	GG	GG	TT
	253	Xinmai 23	Henan,China	2010s	GG	GG	TT
	254	Yumai 49	Henan,China	2000s	GG	GG	TT
	255	Yumai 54	Henan,China	1990s	GG	GG	TT
	256	Xiaoyan 22	Shanxi,China	2000s	GG	GG	TT
	257	Xiaoshui 33	Shanxi,China	-	GG	GG	TT
	258	Fengyou 1	Guizhou,China	1990s	GG	GG	TT
	259	CMT-4	Foreign	-	GG	GG	TT
	260	Huajiechangbaican	Zhejiang,China	地方种	GG	GG	TT
	261	Jiangmai	Guizhou,China	地方种	GG	GG	TT
	262	Jichun 1016	Jilin,China	1980s	GG	GG	TT
	263	Lumai 14	Shandong,China	1990s	GG	GG	TT
	264	Xinyang 12	Henan,China	-	GG	GG	TT
	265	Zhengmai 9201	Henan,China	-	GG	GG	TT
	266	Yumai 18	Henan,China	1990s	GG	GG	TT
	267	Ailiduo	Italy	-	GG	GG	TT
	268	PNE394-2	Pakistan	-	GG	GG	TT
	269	BH941	Brazil	-	GG	GG	TT
	270	Minifen	Chile	-	GG	GG	TT
	271	MIETI	Italy	-	GG	GG	TT
	272	Yanzhan 1	Henan,China	2000s	GG	GG	TT
Heterozygous type	273	Taishan 27	Shandong,China	2010s	AA	GA	CC
	274	Yannong 19	Shandong,China	2000s	AA	GA	CC
	275	Tanmai 98	Shandong,China	2010s	AA	GA	CC
	276	Yumai 7	Henan,China	1980s	AA	GG	CT
	277	Shengmai 102	Shandong,China	2010s	GA	AA	CC
	278	Xiaoyan 503	Shanxi,China	2000s	GA	GA	CC
	279	Guixie 3	Guizhou,China	2010s	GA	GA	CC
	280	Guixie 12-1	Guizhou,China	-	GA	GA	CC
	281	Luyuan 158	Shandong,China	-	GA	GA	CT
	282	Yannong 173	Shandong,China	2010s	GA	GA	TT
	283	Guinong 25	Guizhou,China	2000s	GA	GA	TT
	284	Chuanmai 56	Sichuan,China	2000s	GA	GG	CC
	285	Xinong 3517	Shanxi,China	2000s	GA	GG	CC
	286	Lumai 1	Shandong,China	1980s	GA	GG	CT
	287	Liangxing 99	Shandong,China	2000s	GA	GG	TT
	288	Chuannong 21	Sichuan,China	2000s	GA	GG	TT
	289	Chuanyu 24	Sichuan,China	2000s	GA	GG	TT
	290	Lemai 5	Qinghai,China	1990s	GA	GG	TT
	291	Xinong 2611	Shanxi,China	1990s	GA	GG	TT
	292	Xinong 889	Shanxi,China	2000s	GA	GG	TT
	293	Xinong 979	Shanxi,China	2000s	GA	GG	TT
	294	Guixie 9-3	Guizhou,China	-	GA	GG	TT
	295	Xinmai 289	Shandong,China	2000s	GG	GG	CT
Missing data	296	Chuanmai 28	Sichuan,China	1990s	AA	NN	CC
	297	Lumai 23	Shandong,China	1990s	AA	NN	CC
	298	Shannong 15	Shandong,China	2000s	AA	NN	CC
	299	Luyuan 205	Shandong,China	2000s	AA	NN	CC
	300	Qidu 1	Shandong,China	-	AA	NN	CC
	301	Pronghor	America	-	AA	NN	CC
	302	Luomai 29	Henan,China	2010s	AA	NN	CC
	303	Xiaoyan 81	Shanxi,China	2000s	GA	NN	CC
	304	Weimai 1917	Shandong,China	-	GA	NN	NN
	305	Tainong 19	Shandong,China	2010s	GA	NN	TT
	306	Chuannong 17	Sichuan,China	2000s	GG	GG	NN
	307	Mian 33	Sichuan,China	2000s	GG	GG	NN
	308	Duiker	SouthAfrica	-	GG	GG	NN
	309	Mianmai 45	Sichuan,China	2000s	GG	NN	CC
	310	Lunxuan 149	Beijing,China	2020s	NN	GG	CC
	311	Taishan 21	Shandong,China	2000s	NN	GG	CC
	312	Tainong 32	Shandong,China	-	NN	GG	CC
	313	Jimai 21	Shandong,China	2000s	NN	GG	CC
	314	Denghai 206	Shandong,China	2010s	NN	NN	CT
